667 So. Carondelet St., Los Angeles, Calif., by Jessica A. Potter; P. Smith Walker, 2127 Cypress St., Vancouver, B. C., Canada, by John McB. Robertson.

A letter was read from Dr. Evermann to the Northern Division in which Dr. Evermann expressed his sincere appreciation of the honorary membership conferred upon him. Notice was received that Mr. Ruthven Deane would be unable to represent the Cooper Ornithological Club at the Ridgway Bird Sanctuary Convention. On the motion of Dr. Miller, duly seconded and carried, the appointment of another representative was left to be decided by the Northern Division, in as much as that division had taken the initial step in the matter.

In the absence of Dr. Rich, chairman of the nominating committee, Mr. Chambers reported nominations as follows: President, Dr. Louis B. Bishop; Vice-President, J. S. Appleton; Secretary, Alden H. Miller. The nominations were moved closed and the secretary instructed to cast his ballot in favor of the nominees. The motion was made by Dr. Miller, seconded by Mr. Michener, and carried.

Mr. Frederick S. Webster then gave an interesting talk concerning the feelings of birds and their mental traits, illustrated by many interesting stories gained from personal study of caged birds. The talk was followed by questions and discussion of matters brought to members' attention by Mr. Webster. Adjourned.—ALDEN H. MILLER, *Secretary*.

FEBRUARY.—The regular monthly meeting of the Southern Division of the Cooper Ornithological Club was held at the Los Angeles Museum, Exposition Park, February 23, 1926, at 8 P. M. The meeting was called to order by President Bishop with thirty-five members and visitors present. Minutes of the January meeting were read and approved, and the January minutes from the Northern Division were read.

The following names were submitted for membership: Edward J. Booth, 303 W. 3rd St., San Dimas, Calif.; Curtis D. Hillyer, Scripps Bldg., San Diego, Calif.; and Francis Beach White, Concord, New Hampshire, by W. Lee Chambers; Edward C. Bull, 510 So. Madison Ave., Pasadena, Calif., by Myrtle S. Edwards; Mrs. Etta MacIntyre, 1820 Bushnell St., So. Pasadena, Calif., by Roland C. Ross; Miss Gladys E. Record, 44 Fairview Ave., Los Gatos, Calif., by Miss Emily Smith; Rob-

ert P. Rowley, 1172 W. 29th St., Los Angeles, Calif., by Alden H. Miller; and George Buchanan Simpson, Lake Cowichan, British Columbia, Canada, by John McB. Robertson.

Mr. Law read a letter from Mrs. M. H. Wegener, 2215 S. Date Ave., Alhambra, Calif., asking that she be dropped from the club. On motion of Dr. Miller the club voted to accept the resignation.

Dr. Miller reported the action of the program committee for the first annual meeting, stating that few papers had at the time been promised and that many more would be needed. Members were urged to mail the printed cards, with the titles of their papers, to Dr. Miller as soon as possible.

The speaker of the evening, Dr. Wilkenson of Australia, gave an account of certain birds and mammals of Australia, illustrated by a series of lantern slides. Of particular interest was his discussion of the Monotremata and Marsupialia and their adaptations in an environment where there was no competition from higher forms. The danger of introducing new species into Australia was emphasized, as also the need for maintaining the balance of nature. Pictures of the great Australian Eagle showing the nest and young, and an account of the incubator nest of the Brush Turkey were of special interest. The meeting was closed with the usual discussion between members.—Adjourned.—ALDEN H. MILLER, *Secretary*.

## DIRECTORY OF MEMBERS OF THE COOPER ORNITHOLOGICAL CLUB

Revised to April 15, 1926

### OFFICERS

#### NORTHERN DIVISION

Amelia S. Allen, President  
Henry W. Carriger, Vice-President  
Hilda Wood Grinnell, Secretary

#### SOUTHERN DIVISION

Louis B. Bishop, President  
J. S. Appleton, Vice-President  
Alden Holmes Miller, Secretary

#### EDITORS

Joseph Grinnell  
Harry S. Swarth

#### BUSINESS MANAGERS

W. Lee Chambers  
Harry Harris

#### ENDOWMENT SECRETARY

Donald R. Dickey

BOARD OF GOVERNORS

Loye H. Miller, President  
 Tracy I. Storer, Permanent Secretary

The above officers, together with the following ex-presidents (not included above, all those whose membership has been continuous since incumbency), constitute the Board of Governors of the Club.

Ralph Arnold, Harold C. Bryant, Herbert L. Coggins, J. S. Cooper, Joseph S. Dixon, Barton Warren Evermann, Walter K. Fisher, Ozra W. Howard, W. B. Judson, C. B. Lastreto, J. Eugene Law, Joseph Mailliard, G. Frean Morcom, Wilfred H. Osgood, Wright M. Pierce, Guy C. Rich, Howard Robertson, Curtis Wright, L. E. Wyman.

MEMBERS

In the following roster, year following address indicates date that member joined the Club; year in parenthesis indicates date member became honorary or life member. Asterisk (\*) preceding indicates life member; § indicates contributor to Endowment Fund.

HONORARY MEMBERS

- \*§Bailey, Florence M. (Mrs. Vernon), 1834 Kalorama Road, Washington, D. C. 1910 (1920) (1920).
- Evermann, Dr. Barton W., Calif. Acad. Sciences, San Francisco, Calif. 1911 (1926).
- Fisher, Dr. A. K., Biol. Survey, Washington, D. C. 1904 (1924).
- Henshaw, Henry W., Biol. Survey, Washington, D. C. 1909.
- \*§Mailliard, Joseph, 1815 Vallejo St., San Francisco, Calif. 1895 (1920) (1924).
- Merriam, Dr. C. Hart, 1919 16th St., Washington, D. C. 1909.
- \*§Morcom, G. Frean, 243 N. Coronado St., Los Angeles, Calif. 1904 (1915) (1922).
- Nelson, Dr. E. W., Biol. Survey, Washington, D. C. 1904 (1917).
- Ridgway, Robert, Route 7, Olney, Ill. 1905.
- §Stephens, Frank, Natural History Museum, Balboa Park, San Diego, Calif. 1894 (1912).

ACTIVE MEMBERS

- Abbott, Clinton G., Nat. Hist. Museum, Balboa Park, San Diego, Calif. 1921.
- Abernathy, Frieda (Mrs. St. E.), 1726 Virginia St., Berkeley, Calif. 1914.
- Abernathy, Mrs. Martin, Box 282, Claremont, Calif. 1925.
- Adams, Benjamin, Wethersfield, Conn. 1920.
- Adams, Frank O., Canfield, West Vancouver, B. C. 1922.
- Adams, Miss Romola M., 912 Linden Ave., Long Beach, Calif. 1921.
- Aitken, Drummond, 766 Milwaukee St., Denver, Colorado. 1924.
- \*Alexander, Miss Annie M., Suisun, Calif. 1908 (1923).
- Allen, Mrs. Amelia S., 37 Mosswood Road, Berkeley, Calif. 1913.
- Allen, Dr. Arthur A., McGraw Hall, Ithaca, N. Y. 1911.

- Allen, Dr. Glover M., Museum of Comparative Zoology, Cambridge, Mass. 1925.
- Allen, Walter I., Route 2, Box 651, Pasadena, Calif. 1922.
- Anderson, Edwin C., Dill Rapids, So. Dakota. 1925.
- Anderson, Elizabeth G., 1030 Cragmont Ave., Berkeley, Calif. 1920.
- Anderson, Dr. Rudolph M., Biol. Div., Victoria Memorial Museum, Ottawa, Ont., Canada. 1916.
- Aniotzbehere, Mrs. Julius H., 128 John St., Salinas, Calif. 1926.
- Anthony, A. W., Nat. Hist. Museum, Balboa Park, San Diego, Calif. 1921.
- Anthony, Mrs. Joseph, 1208 Fuller Ave., Hollywood, Calif. 1922.
- Applegate, Elmer I., Klamath Falls, Ore. 1921.
- \*Appleton, J. S., 1332 Citrus Ave., Hollywood, Calif. 1901 (1919).
- Archilles, Mrs. Gertrude Strong, Fountain Oaks, Morgan Hill, Calif. 1925.
- Armstrong, Edward E., 2249 Calumet Ave., Chicago, Ill. 1914.
- Arnold, E., Grand Trunk Ry., Montreal, Que., Canada. 1909.
- Arnold, Mrs. Lewis, Box 61A, Fair Oaks, Sacramento Co., Calif. 1921.
- Arnold, Dr. Ralph, 639 S. Spring St., Los Angeles, Calif. 1893.
- Atkinson, Dr. Spencer R., Pacific Southwest Bank Bldg., Pasadena, Calif. 1925.
- Atkinson, W. L., 35 Hawthorne Way, San Jose, Calif. 1901.
- Atsatt, Miss Sarah R., 345 S. Serrano Ave., Los Angeles, Calif. 1911.
- Austin, Miss Dorothy K., 1121 Arden Road, Pasadena, Calif. 1921.
- Averill, Charles Ketchum, 1075 Iranistan Ave., Bridgeport, Conn. 1922.
- Bade, Dr. Wm. F., 2616 College Ave., Berkeley, Calif. 1903.
- Badger, M. C., Santa Paula, Calif. 1915.
- Bailey, Alfred M., Colo. Museum Nat. Hist., Denver, Colo. 1917.
- Bailey, Bernard, R. D. 1, Elk River, Minn. 1911.
- Bailey, H. H., 204 Professional Bldg., Miami, Florida. 1903.
- Bailey, Vernon, 1834 Kalorama Road, Washington, D. C. 1904.
- Baker, Chas. H., 594 13th St., Oakland, Calif. 1921.
- \*§Baldwin, S. P., 11025 East Boulevard, Cleveland, Ohio. 1920 (1920).
- §Bales, Dr. B. R., 149 W. Main St., Circleville, Ohio. 1906.
- Ball, Wm. H., Eureka, Calif. 1922.
- Ball, Wm. Howard, 1233 Irving St., N. W., Washington, D. C. 1926.
- Ballard, Mrs. Maria V., 701 Post St., San Francisco, Calif. 1919.
- Bamford, Mrs. G. L., 1428 Castro St., Oakland, Calif. 1918.
- Bancroft, Griffing, 2525 First St., San Diego, Calif. 1920.
- §Bangs, Outram, Museum Comp. Zool., Cambridge, Mass. 1906.
- Barker, Fred, Parkers Prairie, Minn. 1914.

- Barker, John P., 460 Cypress Ave., Burbank, Calif. 1926.
- Barnes, C. A., 1815 S. Western Ave., Los Angeles, Calif. 1921.
- Barnes, Claude T., 359 10th Ave., Salt Lake City, Utah. 1915.
- Barnes, Frances V., 1815 S. Western Ave., Los Angeles, Calif. 1921.
- \*§Barnes, R. Magoon, Lacon, Ill. 1908 (1921).
- Bartlett, Mrs. Adelaide R., Assessor's Office, City Hall, San Francisco, Calif. 1922.
- Bassett, F. N., 1338 8th St., Alameda, Calif. 1919.
- Bastin, Catharine S., 1207 Bonita Ave., Berkeley, Calif. 1926.
- Batchelder, Chas. F., 7 Kirkland St., Cambridge, Mass. 1910.
- Bates, Josephine J., 1267 Sunset Ave., Pasadena, Calif. 1921.
- Battles, Carroll David, 2527 S. Dunsmuir Ave., Los Angeles, Calif. 1924.
- Baxter, Philip Norman, 159 Churchill Ave., Palo Alto, Calif. 1924.
- Baynard, Oscar E., Box 104, Plant City, Florida. 1924.
- Beaman, Susan E., 2425 Hearst Ave., Berkeley, Calif. 1923.
- Beattie, S. H., Tubac, Ariz. 1924.
- \*§Beck, Rollo H., R. D. 21, San Jose, Calif. 1894 (1919).
- Beebe, Wm., 33 West 67th St., New York, N. Y. 1926.
- Bell, B. C., 235 8th St., San Francisco, Calif. 1919.
- Benjamin, Elbert, 117 Coral St., Los Angeles, Calif. 1920.
- Bennet, Eleanor V. V., 2445 Woolsey St., Berkeley, Calif. 1920.
- \*Bent, A. C., 140 High St., Taunton, Mass. 1909 (1922).
- Bergtold, Dr. W. H., 1159 Race St., Denver, Colo. 1917.
- Berry, Elverson C., Box 234, Conway, New Hampshire. 1925.
- Betterley, Bertram O., 2005 2nd St., Eureka, Calif. 1922.
- Bicknell, Mrs. F. T., 319 S. Normandie Ave., Los Angeles, Calif. 1913.
- Bigelow, Homer L., 37 Old Orchard Road, Chestnut Hill, Mass. 1910.
- \*Bishop, Dr. Louis B., 450 S. Bradford St., Pasadena, Calif. 1904 (1920).
- Blackwelder, Miss Martha Jean, Box N N, Stanford University, Calif. 1925.
- Blake, Mrs. Edwin T., R.F.D. 1, Box 34, Berkeley, Calif. 1917.
- Blayney, Nita A., 920 O St., Fresno, Calif. 1911.
- Blickensderfer, Clark, 850 Grant St., Denver, Colo. 1922.
- Bliss, John D., Pozo, San Luis Obispo Co., Calif. 1916.
- Bliss, Leslie Edgar, R.F.D. 3, Box 158-A, Pasadena, Calif. 1923.
- Boeing, W. E., The Highlands, R. D. 2, Seattle, Wash. 1914.
- Boettner, Henry, 127 N. Murat St., New Orleans, La. 1925.
- Bogle, Mrs. Sara S., 2951 Linden Ave., Berkeley, Calif. 1921.
- Bolander, L. Ph., Jr., 1947 E. 28th St., Oakland, Calif. 1907.
- Bolt, B. F., 1421 Prospect Ave., Kansas City, Mo. 1916.
- Booth, Edward J., 303 W. 3rd St., San Dimas, Calif. 1926.
- Borell, Adrey E., 2149 Blake St., Berkeley, Calif. 1918.
- Bowdish, B. S., Demarest, N. J. 1910.
- Bowles, J. H., The Woodstock, Tacoma, Wash. 1903.
- Boyle, Ashby D., 380 E St., Salt Lake City, Utah. 1915.
- Boyle, Miss Una, Calpella, Calif. 1921.
- Bradford, Chas. H., 852 E. 5th St., Pomona, Calif. 1925.
- Braislin, Dr. William C., 425 Clinton Ave., Brooklyn, N. Y. 1910.
- Bramkamp, Richard, Banning, Calif. 1921.
- Brandreth, Courtney, Ossining, New York. 1925.
- Brandt, H. W., 2025 E. 88th St., Cleveland, Ohio. 1914.
- Bremér, Bernhard Charles, 516 Battery St., San Francisco, Calif. 1925.
- Briggs, Dr. LeRoy H., 2635 Broderick St., San Francisco, Calif. 1926.
- \*Brooks, Allan, Okanagan Landing, B. C., Canada. 1906 (1920).
- Brooks, L., Box 539, New Bedford, Mass. 1913.
- Brooks, Winthrop Sprague, Boston Soc. Nat. Hist., 234 Berkeley St., Boston, Mass. 1923.
- Brown, D. E., 87 Lenora St., Seattle, Wash. 1909.
- \*Brown, Edward J., Box 99, Eustis, Lake County, Fla. 1915 (1919).
- Brown, Mrs. Herbert, 434 E. 2nd St., Tucson, Ariz. 1914.
- Brown, Nellie May, 354 North Ave. 53, Los Angeles, Calif. 1922.
- Brown, Mrs. Wm. Clark, 945 Orange St., Los Angeles, Calif. 1921.
- Bruce, Miss Bess M., Glendora, Calif. 1924.
- Bruce, Walter, 813 Lincoln Place, Spokane, Wash. 1924.
- Bruner, Stephen C., Estacion Agronomica, Santiago de las Vegas, Cuba. 1925.
- Brunn, Chas. A., 512 Reliance Bldg., Kansas City, Mo. 1925.
- Bryan, William Alanson, Museum Hist., Sci., and Art, Los Angeles, Calif. 1921.
- Bryant, Chas. A., Room 1011 S. P. Bldg., 65 Market St., San Francisco, Calif. 1922.
- \*§Bryant, Dr. Harold C., Museum Vert. Zool., Berkeley, Calif. 1910 (1925).
- Buhn, Mrs. Minnie, 3027 60th Ave., Oakland, Calif. 1921.
- Bull, Daniel Bernard, 920 Kellar Ave., San Jose, Calif. 1919.
- Bull, Edward C., 510 S. Madison Ave., Pasadena, Calif. 1926.
- Bunker, Paul F., 1151 Shattuck Ave., Berkeley, Calif. 1922.
- Burk, Genevieve S., 1601 Oxford St., Berkeley, Calif. 1920.

- Burleigh, Thos. D., Univ. Ga., Athens, Ga. 1918.
- Burnell, Miss Elizabeth, 1029 Spaulding Ave., Los Angeles, Calif. 1921.
- Burnett, W. L., State Agr. Coll., Fort Collins, Colo. 1910.
- Burnham, Dr. Clark, 835 Arlington Road, Berkeley, Calif. 1907.
- Burns, Frank L., Berwyn, Pa. 1909.
- Burns, James R., 645 44th St., Des Moines, Ia. 1922.
- Burtch, Verdi, Branchport, N. Y. 1910.
- Cahn, Alvin R., 1117 W. Nevada St., Urbana, Ill. 1922.
- Cain, Brighton C., 221 Thayer Bldg., Oakland, Calif. 1925.
- Calder, James A., Buena Park, Calif. 1917.
- Calder, Mrs. James A., Buena Park, Calif. 1926.
- Caldwell, Harry R., Box A10, Ketchikan, Alaska. 1925.
- Camp, Dr. Chas. L., Bacon Hall, Univ. Calif., Berkeley, Calif. 1909.
- Campbell, R. A., R. R. Box 188, Burbank, Calif. 1922.
- Canby, Caroline P., San Fernando, Calif. 1921.
- Canfield, Mrs. May, 3672 Florida St., San Diego, Calif. 1922.
- Cantelow, Mrs. E. D., Hotel Whitcomb, San Francisco, Calif. 1923.
- Cantelow, H. C., Hotel Whitcomb, San Francisco, Calif. 1923.
- Cantwell, George G., 7287 Keystone Ave., Palms, Calif. 1915.
- Carpenter, George I., 746 Lincoln Place, Brooklyn, N. Y. 1920.
- Carpenter, N. K., 3775 Kite St., San Diego, Calif. 1901.
- Carriger, H. W., 5185 Trask St., Oakland, Calif. 1895.
- Carth, Mrs. Jean E., Box 1, Huntington Park, Calif. 1926.
- Case, Rev. B. F., Windsor, Conn. 1913.
- Case, C. M., 306 Blue Hills Ave., Hartford, Conn. 1911.
- §Chamberlain, C. W., 36 Lincoln St., Boston, Mass. 1912.
- \*Chambers, W. Lee, Eagle Rock, Calif. 1897 (1919).
- Chaney, Dr. Ralph W., 1129 Keith Ave., Berkeley, Calif. 1923.
- Chapman, Dr. Frank M., Amer. Museum Nat. Hist., New York, N. Y. 1903.
- Cheesman, M. R., 1328 Gower St., Hollywood, Calif. 1919.
- Cheney, E. S., 1838 4th Ave., Oakland, Calif. 1920.
- Cheney, Miss Mary, 48 Hartford Road, So. Manchester, Conn. 1919.
- Clabaugh, E. D., 18 Lennox Road, Berkeley, Calif. 1923.
- Clark, Prof. Harold W., La Jota, Napa County, Calif. 1925.
- Clark, Josiah H., 641 14th Ave., Paterson, N. J. 1910.
- Clarke, Miss Mary S., Maplewood, Pittsfield, Mass. 1925.
- Clay, C. Irvin, Box 353, Eureka, Calif. 1910.
- Cleaves, Howard H., 242 W. 109th St., New York, N. Y. 1921.
- Clyde, Norman, Independence, Inyo County, Calif. 1926.
- Coale, Henry K., Highland Park, Ill. 1907.
- Cockefair, Miss Ellen A., 2415 Telegraph Ave., Oakland, Calif. 1925.
- Coffin, Mrs. Percival, 5708 Kenwood Ave., Chicago, Ill. 1926.
- Coggins, Herbert L., 2929 Piedmont Ave., Berkeley, Calif. 1910.
- Cohen, Donald A., 2618 Lincoln St., Alameda, Calif. 1901.
- Cohn, Mrs. Effie C., Key Route Inn, Oakland, Calif. 1923.
- \*§Colburn, Albert E., 716 S. Flower St., Los Angeles, Calif. 1905 (1915).
- Cole, Mrs. Arthur H., Hotel Whitecotton, Berkeley, Calif. 1917.
- Cole, F. R., Box 491, Orlando, Fla. 1922.
- Cole, John L., R.D. 5, Nevada, Ia. 1922.
- Comstock, Dr. John, Southwest Museum, Los Angeles, Calif. 1920.
- \*§Conover, H. B., 6 Scott St., Chicago, Ill. 1924.
- Cook, Fred'k W., 1604 E. Harrison St., Seattle, Wash. 1919.
- Cook, Miss Inez, Glendora, Calif. 1924.
- Cooke, Miss May T., 2572 University Place, Washington, D. C. 1918.
- Cookman, Alfred, 938 E. Dryden St., Glendale, Calif. 1912.
- Cooper, J. S., 310 Howard Ave., Piedmont, Calif. 1903.
- Copeland, Ada Belle, 1103 White Ave., Grand Junction, Colo. 1924.
- Cordier, A. H., 415 Benton Boulevard, Kansas City, Mo. 1924.
- Corwin, Ada Bell, Hot Springs, Tulare Co., Calif. 1925.
- Covel, Paul F., 4350 Cleveland Ave., San Diego, Calif. 1925.
- Cozens, Harold H., 1631 Posen Ave., Berkeley, Calif. 1921.
- Craig, Agnes Somerville, 1221 Summit Ave., Pasadena, Calif. 1923.
- Craven, Jesse T., 8935 Colfax St., Detroit, Mich. 1909.
- Crockett, Harry L., 38 Indianola Ave., Phoenix, Ariz. 1924.
- Crosby, Maunsell S., Grasmere Farms, Rhinebeck, N. Y. 1911.
- Crow, Mrs. G. Maurice, Glendora, Calif. 1923.
- Crum, Ethel, Box 92, Concord, Calif. 1920.
- Culver, Geo. B., Stanford University, Calif. 1921.
- Culver, Susan B., 2423 Prospect St., Berkeley, Calif. 1914.
- Cummings, Byron, Univ. Ariz., Tucson, Ariz. 1916.
- Cunningham, Walter, 3009 Dunham Ave., Kansas City, Mo. 1921.
- Currier, Ed. S., 416 E. Chicago St., St. Johns Sta., Portland, Ore. 1904.
- Danforth, Stuart T., Dept. of Biology, Temple University, Philadelphia, Pa. 1925.
- Davenport, Mrs. Elizabeth B., Northern Ave., Brattleboro, Vt. 1911.

- Davenport, Mrs. W. S., 2730 Stuart St., Berkeley, Calif. 1922.
- Davis, Dr. Frederick B., 421 Perkins St., Oakland, Calif. 1916.
- Davis, Henry W., Seaside Hotel, Atlantic City, N. J. 1922.
- Davis, John M., 737 M St., Eureka, Calif. 1908.
- Davis, Minot, 701 North E St., Tacoma, Wash. 1924.
- Davy, Geo. L., Antler, North Dakota. 1925.
- \*Dawson, W. Leon, R.D. 3, Box 83, Santa Barbara, Calif. 1906 (1915).
- Deane, Ruthven, 112 W. Adams St., Chicago, Ill. 1904.
- Deane, Walter, 29 Brewster St., Cambridge, Mass. 1907.
- Dearborn, Dr. Ned, Sackett Harbor, N. Y. 1909.
- Decker, F. R., Kiona, Wash. 1913.
- DeGroot, Dudley S., 332 Channing Ave., Palo Alto, Calif. 1916.
- deLaubenfels, Max Walker, 1499 E. Walnut St., Pasadena, Calif. 1921.
- Delpert, Mrs. Mary E., 1601 Oxford St., Berkeley, Calif. 1923.
- DeLury, Ralph E., Dominion Observatory, Ottawa, Ontario, Canada. 1926.
- Denny, Judge Thos. C., Sonoma, Calif. 1924.
- Deweese, Miss Elizabeth, Whitehead Rd. and Marshall St., Norristown, Pa. 1922.
- Dickens, Charles, Key Route Inn, Oakland, Calif. 1923.
- Dickenson, A. B., R.D. 1, Box 11B, San Gabriel, Calif. 1916.
- Dickenson, Mrs. A. B., R.D. 1, Box 11B, San Gabriel, Calif. 1919.
- \*§Dickey, Donald R., 514 Lester Ave., Pasadena, Calif. 1910.
- Dickey, Mrs. Florence V. V., 514 Lester Ave., Pasadena, Calif. 1923.
- Dille, F. M., Valentine, Neb. 1903.
- Dings, G. M., 2161 Ry. Exch. Bldg., St. Louis, Mo. 1920.
- Dixon, James Benjamin, Escondido, Calif. 1924.
- Dixon, Joseph, Museum Vert. Zool., Berkeley, Calif. 1904.
- Dodge, Laura I., 3031 Eliot St., Long Beach, Calif. 1915.
- Doolittle, E. A., Box 44, Painesville, Ohio. 1918.
- Drachman, Myra, 3031 Eliot St., Long Beach, Calif. 1915.
- DuBois, Alexander Dawes, 327 S. Glenwood Ave., Springfield, Ill. 1911.
- Duer, Craig R., 830 Washington Blvd., Grants Pass, Ore. 1924.
- Dunkelberger, Harry Warren, Flourtown, Montgomery Co., Pa. 1924.
- Duprey, H. F., Dixon, Calif. 1907.
- Durfee, Owen, 727 Madison St., Fall River, Mass. 1911.
- Dutton, P. C., 65 High St., Stone Staffs, England. 1913.
- Dwight, Dr. Jonathan, Jr., 43 W. 70th St., New York, N. Y. 1904.
- Dyke, Mrs. Estelle D., 405 E. Stocker St., Glendale, Calif. 1923.
- Dyson, James Seabrook, The Army and Navy Club, Pall Mall, P. T. O., London, S. W. 1, England. 1924.
- Easton, Mrs. Jane F., Torrey Road, La Jolla, Calif. 1920.
- Eaton, S. Harrison, Box 653, Lawrenceville, Ill. 1916.
- Eaton, Warren F., care Wellington Sears & Co., 66 Worth St., New York, N. Y. 1926.
- Edson, J. M., Marietta Road, Bellingham, Wash. 1911.
- Edwards, Myrtle S., 2311 N. Allen Ave., Altadena, Calif. 1925.
- \*Eggleston, J. W., Junior College, Riverside, Calif. 1913 (1919).
- Ellis, Mrs. Ella Haines, 910 Grattan St., Los Angeles, Calif. 1922.
- Ellis, Ralph, 2420 Ridge Road, Berkeley, Calif. 1923.
- Ellis, Ralph, Jr., 2420 Ridge Road, Berkeley, Calif. 1923.
- Elmore, Louis A., 1420 Josephine St., Berkeley, Calif. 1920.
- \*Emerson, W. Otto, Palm Cottage, Hayward, Calif. 1920 (1921).
- English, Thomas A., 2001 Haste St., Berkeley, Calif. 1923.
- Enochs, Rex P., 1155 Mullen Ave., Los Angeles, Calif. 1921.
- Erichsen, W. J., 2311 Barnard St., Savannah, Ga. 1925.
- Esterly, Dr. C. O., Occidental College, Los Angeles, Calif. 1908.
- Evans, Ella A., Exeter, Calif. 1922.
- Evans, Frank C., Crawfordsville, Ind. 1918.
- Evans, J. Harold, R.D. 4, Box 500, Santa Rosa, Calif. 1917.
- Evans, Wm. V., Livingston, Mont. 1920.
- Everhart, Mrs. Helen, 750 E. Colorado St., Pasadena, Calif. 1925.
- Fargo, Mrs. Minerva J., 1632 N. Kingsley Drive, Los Angeles, Calif. 1914.
- Farley, Frank La Grange, Camrose, Alberta, Canada. 1923.
- Faulconer, Thomas N., San Diego Zoological Gardens, Balboa Park, San Diego, Calif. 1925.
- Felger, A. H., North Side High School, Denver, Colo. 1920.
- \*Ferguson, Mrs. Aurelia B., 999 Gramercy Drive, Los Angeles, Calif. 1922 (1922).
- Ferguson, Mrs. Mary Van E., 1 Orchard Lane, Berkeley, Calif. 1915.
- Ferriss, James H., West Park, Joliet, Ill. 1923.
- Field, Clyde, 1859 Julian Ave., San Diego, Calif. 1919.
- Figgins, J. D., Colorado Museum Nat. History, Denver, Colo. 1925.
- Finley, Wm. L., Jennings Lodge, Ore. 1900.
- Fischer, Otto, Trinidad, Cuba. 1926.
- Fisher, Miss Edna M., 2410 Fulton St., Berkeley, Calif. 1923.
- Fisher, Miss Elizabeth W., 2222 Spruce St., Philadelphia, Pa. 1910.
- Fisher, Prof. Walter K., Stanford Marine Laboratory, Pacific Grove, Calif. 1900.

- Fleming, J. H., 267 Rusholme Road, Toronto 4, Ont., Canada. 1910.
- Fletcher, L. B., 54 Cotswald Road, Brookline, Mass. 1922.
- Fletcher, Lyle R., 1202 Kentucky St., Lawrence, Kan. 1920.
- Flinn, Catherine Mills, 1799 University Ave., Berkeley, Calif. 1920.
- Floyd, Charles Benton, 454 Wolcott St., Auburndale, Mass. 1922.
- Flynn, Helen, 1546 Shattuck Ave., Berkeley, Calif. 1920.
- Follett, W. I., 3621 Broadway, Oakland, Calif. 1926.
- Forbush, E. H., State House, Boston, Mass. 1916.
- Forrest, Earle R., 205 N. Main St., Washington, Pa. 1910.
- Fortiner, John C., Box 496, Brawley, Calif. 1910.
- Foster, Goodwin L., 1124 Keeler Ave., Berkeley, Calif. 1925.
- Foster, Miss Rhoda, 721 Peralta Ave., Berkeley, Calif. 1924.
- Fowler, Frederick H., 221 Kingsley Ave., Palo Alto, Calif. 1901.
- Frank, Arthur W., Wash. Exp. Sta., Puyallup, Wash. 1920.
- Frazer, J. Thomas, Jr., 432 W. Hawthorne St., Eureka, Calif. 1920.
- Frederick, Mrs. Adeline, 1201 Henry St., Berkeley, Calif. 1922.
- French, Mrs. A. J., Carlton, Ore. 1921.
- French, Dr. C. E., 62 Holyrood Ave., Lowell, Mass. 1926.
- French, James G., The Menagerie, 3628 Saanich Road, Victoria, B. C., Canada. 1918.
- Frye, Prof. T. C., Univ. Wash., Seattle, Wash. 1919.
- Fuertes, Louis A., 201 Wyckoff Ave., Ithaca, N. Y. 1904.
- Gabrielson, Ira N., 515 P. O. Bldg., Portland, Ore. 1919.
- Gallup, Frederick Norman, Escondido, Calif. 1921.
- Ganier, Albert F., 2507 Ashwood Ave., Nashville, Tenn. 1921.
- Garber, Miss Lida J., 15 Tanglewood Road, Berkeley, Calif. 1923.
- Gartrell, Geo. N., Summerland, B. C., Canada. 1917.
- Gault, Benj. T., 564 N. Main St., Glen Ellyn, DuPage Co., Ill. 1905.
- Gausebeck, A. T., 60 Broadway, New York City, N. Y. 1924.
- Gay, Harold S., 200 S. Wilson Ave., Alhambra, Calif. 1901.
- Gay, Karl E., 1850 Montecito Way, San Diego, Calif. 1925.
- Geiselhart, Miss Josephine, Concord, Calif. 1920.
- Gentry, Howard S., Westmoreland, Calif. 1925.
- Giannini, Chas. A., Poland, N. Y. 1919.
- Giddings, Levi A., 436 Douglas Ave., Salt Lake City, Utah. 1923.
- Gifford, Dr. Harold, 3636 Burt St., Omaha, Neb. 1916.
- Gignoux, Claude, 73 Tunnel Road, Berkeley, Calif. 1919.
- Gilchrist, Francis G., Dept. of Zoology, Pomona College, Claremont, Calif. 1920.
- Giles, Roscoe I., 82 Newton St., Marlborough, Mass. 1917.
- Gilman, M. French, Banning, Calif. 1901.
- Girvin, F. H., 5635 Melrose Ave., Los Angeles, Calif. 1919.
- Goelitz, Herman, 944 Alameda Drive, Portland, Ore. 1920.
- \*Goelitz, Walter A., 170 Nunda Blvd., Rochester, N. Y. 1915 (1920).
- Goldfrank, Arthur, 1107 S. Windsor Blvd., Los Angeles, Calif. 1925.
- Goldman, E. A., Biol. Survey, Washington, D. C. 1901.
- Goldman, Luther J., Biological Survey, Gooding, Idaho. 1902.
- Goodcell, Mrs. Marion L., 864 D St., San Bernardino, Calif. 1914.
- Grant, U. S., 4th, 639 S. Wilton Place, Los Angeles, Calif. 1909.
- Greene, Harold H., 814 Virginia Ave., Columbia, Mo. 1925.
- Gregory, Stephen S., Jr., 345 Barry Ave., Chicago, Ill. 1924.
- Grey, Henry, R.D. 2, Box 154A, San Diego, Calif. 1901.
- Griffee, Willet E., Forest Products Lab., Madison, Wis. 1919.
- Grimes, Samuel A., R.R. No. 6, Box 391, Jacksonville, Fla. 1924.
- Grinnell, Dr. George Bird, 238 E. 15th St., New York, N. Y. 1914.
- \*Grinnell, Hilda Wood, 1794 San Lorenzo Ave., Berkeley, Calif. 1912 (1921).
- \*Grinnell, Prof. Joseph, Museum Vert. Zoology, University of Calif., Berkeley, Calif. 1894 (1919).
- Grinnell, Willard Fordyce, 1794 San Lorenzo Ave., Berkeley, Calif. 1921.
- Gross, Prof. Alfred O., Bowdoin College, Brunswick, Maine. 1923.
- Gunn, Miss Amy E., 2758 Green St., San Francisco, Calif. 1914.
- Gunthorp, Prof. Horace, Mills College, Calif. 1920.
- Hague, Florence S., Oreg. State Agr. Coll., Corvallis, Oreg. 1925.
- Haley, Geo., 2311 Bancroft Way, Berkeley, Calif. 1925.
- Hall, Ansel F., 957 Regal Road, Berkeley, Calif. 1926.
- Hall, Mrs. Carlotta C., 1615 La Loma Ave., Berkeley, Calif. 1915.
- Hall, Mrs. C. H., 2141 N. Highland Ave., Los Angeles, Calif. 1921.
- Hall, E. Raymond, Museum Vert. Zool., Berkeley, Calif. 1924.
- Halladay, Daniel S., 628 E. Chestnut Ave., Santa Ana, Calif. 1910.
- Halleck, Taylor H., Newport, Ore. 1923.
- Hallinen, J. E., Cooperton, Kiowa Co., Okla. 1921.
- Hampton, Mrs. Ethel C., 73 Leese St., San Francisco, Calif. 1914.
- Hanaford, A. W., 4540 West 107th St., Inglewood, Calif. 1917.

- Hands, Frank H., Dos Cabezos, Ariz. 1920.  
 Hann, H. H., Parkdale, Ore. 1909.  
 Hanna, Dr. G. Dallas, Calif. Acad. Sciences, San Francisco, Calif. 1921.  
 \*Hanna, W. C., 141 East F St., Colton, Calif. 1902 (1921).  
 Harding, Mrs. Harriett Squier, Fellows, Calif. 1924.  
 Harding, Richard B., 107 W. Canton St., Boston, Mass. 1925.  
 Harper, Francis, 234 Berkeley St., Boston, Mass. 1920.  
 \*Harris, Harry, 18 W. 52d St., Kansas City, Mo. 1914 (1919).  
 Hart, Cecil, R.R. No. 1, Box 432, Montebello, Calif. 1920.  
 Hartman, Paul J., 1118½ Maple Ave., Los Angeles, Calif. 1917.  
 Hartung, Miss Esther, 124 Mill St., Grass Valley, Calif. 1923.  
 Harwell, Charles Albert, 2626 Haste St., Berkeley, Calif. 1925.  
 Hasbrouck, Henry C., 929 West End Ave., New York City. 1926.  
 Haskett, Mrs. Bert, Box 95A, Route 2, Phoenix, Ariz. 1925.  
 Hatch, Delos, Oakfield, Wis. 1926.  
 Hathaway, Harry S., Norwood and Thorn Aves., South Auburn, R. I. 1912.  
 Havemeyer, Henry O., Mahwah, N. J. 1917.  
 Haven, Herbert M. W., 500 Forest Avenue, Portland, Maine. 1926.  
 Hayes, Mrs. F. M., Box 591, Davis, Calif. 1919.  
 Haywood, J. F., Mather, Tuolumne Co., Calif. 1923.  
 Head, Miss Anna, 2809 Forest Ave., Berkeley, Calif. 1912.  
 Heath, Prof. Harold, 181 Ocean View Ave., Pacific Grove, Calif. 1919.  
 Hedges, Chas. F., Box 24, Miles City, Mont. 1919.  
 Heineman, O. J., 1672 Grove St., San Francisco, Calif. 1908.  
 Heller, Edmund, Field Museum Nat. Hist., Chicago, Ill. 1894.  
 Helme, Arthur H., Miller Place, Suffolk Co., N. Y. 1911.  
 Hendee, Russell W., 51 Poplar St., Brooklyn, N. Y. 1923.  
 Henderson, A. D., Belvedere, Alberta, Canada. 1923.  
 Henderson, H. N., 216 E. Philadelphia St., Whittier, Calif. 1923.  
 Henderson, Prof. Junius, Boulder, Colo. 1909.  
 Henderson, Walter C., 8 Magnolia Parkway, Chevy Chase, Md. 1918.  
 Hendren, Miss Elizabeth, Occidental, Calif. 1920.  
 Henshaw, Judge F. W., 762 Mills Bldg., San Francisco, Calif. 1915.  
 \*Hersey, F. Seymour, 6 Maple Ave., Taunton, Mass. 1915 (1920).  
 Hill, Albert E., 509 Valle Vista Ave., Oakland, Calif. 1925.  
 Hill, Grace A., Camp Kearny Hospital, San Diego, Calif. 1922.  
 Hillyer, Curtis D., Scripps Building, San Diego, Calif. 1926.  
 Hilton, Dr. W. A., Claremont, Calif. 1921.  
 Hoffman, Louis E., Box Cor. Benner and Shults St., Los Angeles, Calif. 1920.  
 Hoffmann, Ralph, Carpinteria, Calif. 1920.  
 Hohfeld, Mrs. Edward, 2500 Broadway, San Francisco, Calif. 1920.  
 Holcombe, Miss Frances, 2527½ Hearst Ave., Berkeley, Calif. 1926.  
 Holden, Anna H. L., 2835 Divisadero St., San Francisco, Calif. 1924.  
 \*Holland, Harold M., Box 515, Galesburg, Ill. 1901 (1920).  
 Holliger, Charles Daniel, M.D., 215 Commercial Svgs. Bank Bldg., Stockton, Calif. 1925.  
 Holman, F. C., care Savings Union Branch, Mercantile Trust Co., San Francisco, Calif. 1914.  
 Homer, Mrs. W. H., Jr., 1625 S. Fifth St. East, Salt Lake City, Utah. 1924.  
 \*Hoover, Prof. Theodore J., Box A, Stanford University, Calif. 1898 (1916).  
 Horsfall, R. Bruce, R. 6, Box 80, Portland, Ore. 1914.  
 Houghton, John D., 152 Suffolk Rd., Chestnut Hill, Mass. 1922.  
 Howard, Miss Hildegard, 973 N. Normandie Ave., Los Angeles, Calif. 1924.  
 Howard, O. W., 9th and Olive Sts., Los Angeles, Calif. 1895.  
 Howatt, Dr. G. A., Humboldt Nat. Bank Bldg., Eureka, Calif. 1925.  
 Howatt, Haven D., 1922 F St., Eureka, Calif. 1924.  
 \*Howell, Alfred Brazier, Room 61, U. S. Nat. Mus., Washington, D. C. 1908 (1915).  
 Howell, Arthur H., 2919 S. Dakota Ave., Washington, D. C. 1916.  
 Howell, B. F., Jr., 52 Patton Ave., Princeton, N. J. 1909.  
 Howes, Paul G., 46 Auldwood Road, Stamford, Conn. 1910.  
 Huber, Wharton, Academy of Natural Sciences, 19th and Race Sts., Philadelphia, Pa. 1915.  
 Hudson, L. W., 1554 W. 45th St., Los Angeles, Calif. 1917.  
 \*Huey, Laurence, Natural History Museum, Balboa Park, San Diego, Calif. 1909 (1921).  
 Humphrey, Mary Brown, Univ. of Iowa Library, Iowa City, Iowa. 1924.  
 Hungate, J. W., State Normal School, Cheney, Wash. 1924.  
 Hunt, Chreswell J., 5943 Rice St., Chicago, Ill. 1919.  
 Hunter, J. S., Box 482, San Mateo, Calif. 1903.  
 Hurley, John B., 107 So. Almon St., Moscow, Idaho. 1921.  
 Husher, Mrs. Gertrude H., 821 S. Hope St., Los Angeles, Calif. 1913.  
 Illingsworth, J. F., Univ. Hawaii, Honolulu, T. H. 1896.  
 Ingersoll, Albert M., 908 F St., San Diego, Calif. 1895.

- Isham, C. Bradley, 909 Valley Road, Upper Montclair, N. J. 1909.
- Jackson, Dr. Hartley H. T., Biol. Survey, Washington, D. C. 1921.
- Jackson, Ralph W., R.D. 1, Cambridge, Md. 1917.
- Jacobs, J. Warren, 404 S. Washington St., Waynesburg, Pa. 1909.
- Jacobsen, W. C., 2319 M St., Sacramento, Calif. 1916.
- Jacot, Edward C., Box 462, Prescott, Ariz. 1923.
- Jaeger, Edmund C., 1462 W. 6th St., Riverside, Calif. 1922.
- Jay, Antonin, 1622 Pennsylvania Ave., Los Angeles, Calif. 1901.
- Jay, William, 12 Westview Ave., Mt. Airy, Philadelphia, Pa. 1925.
- Jensen, Parley E., 704 Ogden Ave., Ogden, Utah. 1925.
- Jesurun, Dr. Mortimer, 905 Gaviota Ave., Long Beach, Calif. 1916.
- Jesser, Harvey Hogan, 4232 Montgomery St., Oakland, Calif. 1925.
- Jewett, Stanley G., 582 Bidwell Ave., Portland, Ore. 1909.
- Johnson, A. C., Whittier Nat. Bank, Whittier, Calif. 1919.
- Johnson, Miss Clare E., Room 151, City Hall, San Francisco, Calif. 1921.
- Johnson, H. H., Pittsfield, Me. 1920.
- Johnson, Henry W., 284 East Orange Grove Ave., Pasadena, Calif. 1924.
- Johnson, Dr. Myrtle E., National City, Calif. 1908.
- Jones, Egbert R., Box 338A, Ceres, Calif. 1925.
- Jones, Dr. Lynds, Museum Oberlin Coll., Oberlin, Ohio. 1911.
- Jordan, A. H. B., Everett, Wash. 1911.
- Jordan, Dr. David Starr, Stanford University, Calif. 1902.
- Judson, W. B., 826 Washington Bldg., Los Angeles, Calif. 1894.
- Kaeding, Geo. L., 704 Palm Drive, Glendale, Calif. 1903.
- Kalmbach, Edwin R., Biological Survey, Washington, D. C. 1923.
- Keck, David D., Box 331, Claremont, Calif. 1924.
- Keefer, Miss Mary Bell, 1411 Montana St., El Paso, Texas. 1923.
- Keeler, Mrs. Lauretta B., Box 471, King City, Calif. 1925.
- Kell, Delacourt, Claremont, Calif. 1921.
- Kellogg, Miss Louise, Box 248, Suisun, Calif. 1911.
- Kellogg, Miss Mildred, 2232 Piedmont Ave., Berkeley, Calif. 1921.
- Kellogg, Ralph T., Silver City, N. M. 1916.
- Kellogg, Dr. Vernon L., National Research Council, B and 21st St., Washington, D. C. 1901.
- Kelly, Junea W. (Mrs. G. E.), 1311 Grand St., Alameda, Calif. 1918.
- Kelso, Dr. John Edward Harry, Edgewood, Arrow Lakes, B. C., Canada. 1925.
- \*Kennard, Frederick H., Dudley Road, Newton Centre, Mass. 1911 (1916).
- Kennedy, Clarence H., Zool. Dept., Ohio State Univ., Columbus, Ohio. 1912.
- Kennedy, Miss Eveline, 5330 Pasadena Ave., Los Angeles, Calif. 1921.
- Kennedy, H. M., Jefferson Station, Detroit, Mich. 1925.
- Keyes, Prof. Chas. R., Mt. Vernon, Iowa. 1900.
- Kibbe, A. S., 1534 Grove St., Berkeley, Calif. 1917.
- Kibbe, Bessie W. (Mrs. A. S.), 1534 Grove St., Berkeley, Calif. 1917.
- Kimball, F. E. A., Tucson, Ariz. 1924.
- Kimball, H. H., Paradise, Ariz. 1909.
- King, Albert H., 3612 N. Griffin Ave., Los Angeles, Calif. 1920.
- King, Benjamin H., 1215 Lakeshore Drive, Coeur d'Alene, Idaho. 1921.
- King, S. Edith, 1604 Maltman Ave., Los Angeles, Calif. 1926.
- Kirby, Dr. Harold, Dept. Zoology, Yale University, New Haven, Conn. 1925.
- Kirn, Albert J. B., Box 157, Somerset, Texas. 1918.
- Kittridge, Joseph, Jr., care of Lake States Forest Exper. Sta., University Farm, St. Paul, Minn. 1915.
- Kloss, Philip, 24 Greenbank Ave., Piedmont, Calif. 1922.
- Kluegel, Mrs. Edward A., Carmel, Calif. 1916.
- Knapp, Elmer, Route No. 2, Troy, Pa. 1924.
- Knickerbocker, Chas. K., 445 N. Sacramento Ave., Carpenter Sta., Chicago, Ill. 1905.
- Knowlton, Dr. F. H., U. S. Nat. Museum, Washington, D. C. 1910.
- Kofoid, Prof. C. A., Zool. Dept., Univ. Calif., Berkeley, Calif. 1909.
- Kohler, Louis S., R.D. 2, Paterson, N. J. 1909.
- Kretzman, Prof. P. E., 3705 Texas Ave., St. Louis, Mo. 1914.
- Kuser, John Dryden, Bernardsville, N. J. 1912.
- Labarthe, Jules, care Georgian Manganese Co., Tchiatouri, Georgia, Russia. 1914.
- Laing, Hamilton M., Comox, B. C., Canada. 1926.
- Laing, Mary E., Carmel-by-the-Sea, Calif. 1925.
- La Jeunesse, H. V., 2517 Webb St., Alameda, Calif. 1916.
- Lamb, Chester C., Museum Vert. Zoology, Berkeley, Calif. 1901.
- Lancashire, Sarah (Mrs. J. Henry), Grafton Wood, Manchester, Mass. 1911.
- Lane, Geo. W., Morgan Hill, Calif. 1914.
- Langevin, Elmer, 325 South Broadway, Crookston, Minn. 1922.
- Langstroth, James H., P. O. Box D, Silver City, New Mexico. 1922.
- Lano, Albert, 120 N. Block St., Fayetteville, Ark. 1920.
- Lastreto, C. B., 260 California St., San Francisco, Calif. 1913.
- Lathrop, Oliver A., 101 Beacon St., Boston, Mass. 1925.



- \*§Law, J. Eugene, Altadena, Calif. 1900 (1915).
- \*§Law, Laura Beatty (Mrs. J. E.), Altadena, Calif. 1915 (1919).
- Layne, J. Gregg, 619 Central Building, Los Angeles, Calif. 1912.
- Lazier, Edgar L., Dept. Zoology, University Calif., Berkeley, Calif. 1924.
- Leach, Frank A., 217 Hillside Ave., Piedmont, Calif. 1917.
- Lee, Mrs. Melicent H., El Cajon, Calif. 1920.
- Lee, Ren M., 231 N. C St., Tulare, Calif. 1922.
- Leffingwell, Dana J., Laboratory of Ornithology, Cornell University, Ithaca, N. Y. 1925.
- Leggett, Dr. R. M., 2140 9th Ave., San Francisco, Calif. 1918.
- Lelande, H. J., 200 Currier Bldg., Los Angeles, Calif. 1897.
- Leopold, Aldo, care of Forest Products Lab., Madison, Wis. 1916.
- Libby, Gretchen L., LaVina Sanitarium, Pasadena, Calif. 1911.
- Ligon, J. Stokley, Fort Stockton, Texas. 1914.
- Liliencrantz, H. T., Rancho Las Cimas, Hollister, Calif. 1916.
- Lincoln, Frederick C., U. S. Biological Survey, Washington, D. C. 1922.
- Lindemann, Miss W. C., 1435 8th St., Alameda, Calif. 1922.
- Linsdale, Jean M., Dept. Zoology, University Calif., Berkeley, Calif. 1926.
- §Little, Luther, 1403 Garfield Ave., S. Pasadena, Calif. 1914.
- Littlejohn, Chase, 1226 Warren St., Redwood City, Calif. 1901.
- Livesey, Alice Rose, 373 W. California St., Glendale, Calif. 1921.
- Lloyd, Hoyes, 405 Queen St., Ottawa, Canada. 1923.
- Lofberg, Mrs. Lila McKinley, Edison Camp 62, Big Creek, Calif. 1926.
- Lombardi, Mrs. M. E., 2249 Piedmont Ave., Berkeley, Calif. 1916.
- Lord, James S., St. Stephen, New Brunswick. 1925.
- Loring, J. Alden, Owego, Tioga Co., N. Y. 1914.
- §Love, Guy, Santee, Calif. 1913.
- Low, Mrs. Marion Ware, 1415 Crescent Ave., Hollywood, Calif. 1922.
- Lucas, Lex R., Claremont, Calif. 1925.
- Lueders, Fred H. W., 516 E. Main St., Compton, Calif. 1923.
- Lunt, James C., 109 Liberty St., San Francisco, Calif. 1922.
- Lusk, Richard D., R. 2, Box 722, San Gabriel, Calif. 1915.
- Luther, Clarence H., 8 McIlroy Bldg., Fayetteville, Ark. 1909.
- McIntire, Mrs. Jessie, 2930 Waverley Ave., Los Angeles, Calif. 1926.
- MacIntyre, Mrs. Etta, 1820 Bushnell St., So. Pasadena, Calif. 1926.
- MacKaye, David L., Tulare, Calif. 1922.
- McAtee, W. L., Biol. Survey, Washington, D. C. 1907.
- McBride, Everett, 920 Benton Way, Los Angeles, Calif. 1923.
- McCoy, Frank J., Santa Maria Inn, Santa Maria, Calif. 1923.
- McDaniel, George H., 234 W. Pratt St., Eureka, Calif. 1923.
- McGettigan, Carroll, 2644 Filbert St., San Francisco, Calif. 1921.
- \*McGregor, R. C., Bureau of Science, Manila, P. I. 1893 (1916).
- McKeough, Dr. Geo. T., Erie Manor, R.D. 1, Blenkerin, Ontario, Canada. 1922.
- McLain, R. B., Box 132, Hollywood, Calif. 1897.
- McLean, Donald D., Coulterville, Calif. 1916.
- McLean, Robert R., 2904 Granada St., San Diego, Calif. 1922.
- McLellan, Miss Mary E., Calif. Academy of Sciences, San Francisco, Calif. 1919.
- McNeil, Ethel C. E., Pomona College, Claremont, Calif. 1924.
- Mailliard, Ernest C., Federal Reserve Bank, San Francisco, Calif. 1909.
- Mailliard, John W., 230 California St., San Francisco, Calif. 1894.
- Mannington, Joseph A., 1342 Detroit St., Los Angeles, Calif. 1923.
- Marburger, Clifford, Denver, Lancaster Co., Pa. 1925.
- Marshall, Dr. Benj. M., 2036 D St., Eureka, Calif. 1913.
- Martin, Mrs. Bertha Davis, 1639 Golden Gate Ave., Los Angeles, Calif. 1920.
- Martz, Mrs. Warren H., 4601 Welch Pl., Los Angeles, Calif. 1924.
- Massey, Herbert, Ivy Lea, Burnage, Didsbury, Manchester, England. 1909.
- Mead, Mrs. Edwin B., 2618 Etna St., Berkeley, Calif. 1920.
- Meade, Mrs. Calvert, Box 161, Carmel, Calif. 1916.
- Meadows, Donald C., 231 N. Grand St., Orange, Calif. 1919.
- Meeker, Jesse C. A., Box 161, Danbury, Conn. 1907.
- Meister, H. D., Yoakum, Texas. 1909.
- Merritt, Miss Louisa P., P. O. Box 315, Pasadena, Calif. 1925.
- \*§Mershon, W. B., Saginaw, Mich. 1911 (1919).
- Mestre, Harold, Fresno State College, Fresno, Calif. 1925.
- Mexia, Mrs. Ynes, 401 Medical Bldg., San Francisco, Calif. 1921.
- Michael, Chas. W., Yosemite, Calif. 1916.
- Michener, Harold, 418 Elm Ave., Pasadena, Calif. 1924.
- Middleton, R. J., Jeffersonville, Pa. 1918.
- Mikesell, Mrs. H. B., 1633 Addison St., Berkeley, Calif. 1924.
- Miller, Alden Holmes, 6066 Hayes Ave., Los Angeles, Calif. 1923.
- Miller, Mrs. Delphia S., 1523 Tonawanda Ave., Los Angeles, Calif. 1921.
- Miller, Frederic W., 985 S. Gaylord St., Denver, Colo. 1922.

- Miller, Dr. Loye Holmes, S. Branch, Univ. Calif., Los Angeles, Calif. 1905.
- Miller, Mary Mann, 5928 Hayes Ave., Los Angeles, Calif. 1920.
- Miller, Dr. R. C., Univ. of Wash., Seattle, Wash. 1921.
- Miller, W. De Witt, Amer. Museum Nat. Hist., New York, N. Y. 1909.
- §Mitchell, H. H., Prov. Museum, Normal School, Regina, Sask., Canada. 1915.
- Mitchell, Mrs. Irving J., 1127 W. 20th St., Los Angeles, Calif. 1924.
- Mitchell, Dr. Walton I., Paonia, Delta Co., Colo. 1909.
- Mix, Mrs. Arthur J., 1915 W. 8th St., Los Angeles, Calif. 1922.
- Moffitt, James, 1825 Broadway, San Francisco, Calif. 1917.
- Monk, Harry C., Avoca Apts., Nashville, Tenn. 1925.
- Moore, Miss Nellie, 122 Falcon Ave., Long Beach, Calif. 1915.
- Moore, Robert T., 505 Slavin Bldg., Pasadena, Calif. 1911.
- Moran, R. B., 1318 S. Gramercy Place, Los Angeles, Calif. 1897.
- More, R. L., Vernon, Texas. 1911.
- Morley, Prof. S. Griswold, 2635 Etna St., Berkeley, Calif. 1916.
- Morse, Geo. W., 318 E. 9th St., Tulsa, Okla. 1922.
- Mull, Mrs. Bert F., Foothill Boulevard, Glendora, Calif. 1925.
- Mullen, James L., 1264 Logan Ave., Salt Lake City, Utah. 1915.
- Munro, J. A., Okanagan Landing, B. C., Canada. 1914.
- Murie, Olaus J., 219 7th Ave. S., Moorehead, Minn. 1913.
- Musgrave, Ethel Weatherford (Mrs. M. F.), Box 765, Phoenix, Ariz. 1921.
- Myers, Earl H., 2234 Atherten St., Berkeley, Calif. 1926.
- Myers, Mrs. H. W., 311 N. Ave. 66, Los Angeles, Calif. 1912.
- Myers, Mabel Adelaide, 617 W. Center St., Anaheim, Calif. 1922.
- \*Nace, C. A., 171 W. Santa Clara St., San Jose, Calif. 1920 (1920).
- Nash, Herman W., Box 264, Pueblo, Colo. 1922.
- Naumburg, Mrs. Walter W., Hotel St. Regis, 5th Ave. and 55th St., New York City, N. Y. 1922.
- Neff, Johnson A., Dept. Horticulture, O. A. C., Corvallis, Ore. 1920.
- Neilson, Mrs. Katherine, 1419 Versailles St., Alameda, Calif. 1920.
- Neilson, James Alexander, Wheatland High School, Wheatland, Wyo. 1924.
- Nelson, Roy A., Livermore, Calif. 1925.
- Neterer, Inez May, Lake Erie College, Painesville, Ohio. 1926.
- Newhall, Mrs. Chas. S., 2629 Piedmont Ave., Berkeley, Calif. 1916.
- Nice, Mrs. Margaret M., Norman, Oklahoma. 1921.
- Nichols, J. T., Amer. Museum Nat. Hist., New York, N. Y. 1909.
- Nicholson, Donald J., Orlando, Fla. 1911.
- Nicholson, Gordon, W. 7th St., Ontario, Calif. 1919.
- Niedrach, Robert J., 808 S. Gilfin St., Denver, Colo. 1922.
- Nienburg, Miss Matilda V., 2031 Alameda Ave., Alameda, Calif. 1922.
- Noack, H. R., 309 Perry St., Oakland, Calif. 1901.
- Nokes, Dr. I. D., 1120 Marsh-Strong Bldg., Los Angeles, Calif. 1914.
- Norris, Joseph Parker, Jr., 2122 Pine St., Philadelphia, Pa. 1911.
- Norris, Roy, R. R. B. 253, Richmond, Ind. 1911.
- Norton, Arthur H., 22 Elm St., Portland, Me. 1918.
- Oberholser, Dr. Harry C., 2805 18th St., N. W., Washington, D. C. 1904.
- O'Farrell, Mrs. Mabel E., 2403 F St., San Diego, Calif. 1917.
- Ogden, Dr. H. V., 141 Wisconsin St., Milwaukee, Wis. 1924.
- Ohl, H. C., McKittrick, Calif. 1913.
- Ohlendorf, W. C., 524 E. Stewart Ave., Park Ridge, Ill. 1910.
- Olson, Miss Eva M., 630 Ventura St., Pasadena, Calif. 1925.
- Ormsby, Mrs. Oliver S., 5658 Blackstone Ave., Chicago, Ill. 1925.
- Ortega, James L., Yountville, Napa Co., Calif. 1924.
- Orton, L. R., Fillmore, Calif. 1924.
- Osborne, Ernest Glenn, 161 W. 6th St., Claremont, Calif. 1924.
- Osgood, Dr. Wilfred H., Field Museum Nat. Hist., Chicago, Ill. 1893.
- Osincup, Clayton A., 30 W. Montana St., Pasadena, Calif. 1922.
- Owen, Virgil W., 832 Beacon St., Los Angeles, Calif. 1896.
- Pack, Arthur Newton, 11 Morven St., Princeton, N. J. 1925.
- Page, Paul E., 401 N. Yakima Ave., Tacoma, Wash. 1925.
- Palmer, Miss Elizabeth Day, 1741 Harvard Blvd., Los Angeles, Calif. 1909.
- Palmer, R. H., 207 Hawthorne St., Palo Alto, Calif. 1915.
- \*§Palmer, Dr. T. S., 1939 Biltmore St., N. W., Washington, D. C. 1903 (1920).
- Pangburn, Clifford H., care J. Walter Thompson Co., 244 Madison Ave., New York, N. Y. 1920.
- Parcell, Miss Zulema L., 1633 Orange St., Los Angeles, Calif. 1919.
- Parker, Herbert, South Lancaster, Mass. 1911.
- Parmenter, Henry E., 16 Alameda Court, 220 E. Sola St., Santa Barbara, Calif. 1916.
- Paroni, Clelia A., 2904 Regent St., Berkeley, Calif. 1921.
- Patterson, J. E., Box 478, Ashland, Ore. 1922.
- \*Patterson, Mrs. Theresa Homet, 544 S. El Molino Ave., Pasadena, Calif. 1926.
- Paul, Prof. J. H., 1320 E. 2d St. S., Salt Lake City, Utah. 1915.
- Paul, Lucius H., 436 Carter St., Rochester, N. Y. 1911.

- Paulson, Martin C., R.D. 5, Nevada, Iowa. 1922.
- Peabody, Lloyd, 300 Globe Bldg., St. Paul, Minn. 1924.
- Peabody, Rev. P. B., 411 Vine St., Wamego, Kansas. 1904.
- Pearson, T. Gilbert, 1974 Broadway, New York, N. Y. 1910.
- Peck, Prof. Morton E., 244 N. 12th St., Salem, Ore. 1909.
- Pellew, Miss Marion J., Box 455, Aiken, S. C. 1923.
- Pember, Karl A., Woodstock, Vermont. 1922.
- Pemberton, J. R., 525 N. Palm Drive, Beverly Hills, Calif. 1900.
- Penney, Chas. G., Ojai, Ventura Co., Calif. 1923.
- Pennock, Chas. J., Kennett Square, Philadelphia, Pa. 1909.
- Perine, Keble Barnum, 2218 Bancroft Way, Berkeley, Calif. 1925.
- Perry, Mrs. Elinor B., 254 Main St., Hayward, Calif. 1924.
- Perry, Henry Joseph, 19 Bay State Road, Boston, Mass. 1925.
- Peterson, Axel L., 1615 California Ave., Bakersfield, Calif. 1925.
- Peterson, Edward, 1756 Morgan Place, Hollywood, Calif. 1925.
- Peterson, Hans C., P. O. Box 396, Reedley, Calif. 1924.
- \*Peyton, Laurence, R.D. 2, Fillmore, Calif. 1909 (1922).
- \*Peyton, Sidney B., Sespe, Calif. 1913 (1922).
- Phelps, Frank M., 212 E. 4th St., Elyria, Ohio. 1912.
- \*§Philipp, Philip Bernard, 220 Broadway, New York, N. Y. 1911 (1920).
- §Phillips, Dr. John C., Knobfields, Wenham, Mass. 1911.
- Pickard, Edith A., 2640 Durant Ave., Berkeley, Calif. 1926.
- \*§Pierce, Wright M., Box 343, Claremont, Calif. 1902 (1919).
- Pierpont, Philip, Nordhoff, Calif. 1913.
- Pilsbury, Frank O., 1088 Main St., Walpole, Mass. 1911.
- Pitcher, Mrs. E. C., Route 3, Box 384, Hayward, Calif. 1920.
- Poole, Cecil A., P. O. Box 262, Monmouth, Ore. 1924.
- Pope, E. F., Box 113, El Reno, Okla. 1913.
- Post, Wm. Stone, Bernardsville, N. J. 1925.
- Potter, Miss Jessica A., 1118 Santee St., Los Angeles, Calif. 1922.
- Potter, Laurence B., Gower Ranch, East-end, Sask., Canada. 1925.
- Powell, Miss Helen, Berkeley Inn, Telegraph and Haste Sts., Berkeley, Calif. 1914.
- Pratt, Helen S., 2451 Ridge View Ave., Eagle Rock, Calif. 1920.
- Price, A. E., Grant Park, Ill. 1905.
- Prill, Dr. A. G., Scio, Ore. 1921.
- \*Pringle, Miss Cornelia C., 1816 Vallejo St., San Francisco, Calif. 1915 (1922).
- Procter, James Norris, Box 188, Santa Paula, Calif. 1922.
- Purdy, William B., Milford, Mich. 1921.
- Pursell, Wm. McLain, 9 Eton Court, Berkeley, Calif. 1926.
- Quayle, Ernest Harrison, Box 4, Stanford University, Calif. 1924.
- Quillin, Roy W., 1025 Summit Ave., San Antonio, Texas. 1921.
- Rand, Frank L., 1106 Arcade Bldg., St. Louis, Mo. 1922.
- Randolph, Miss Flora A., 2962 Derby St., Berkeley, Calif. 1907.
- Ransom, Webster H., 708 W. 20th Ave., Spokane, Wash. 1921.
- Rathbun, S. F., 217 14th Ave. N., Seattle, Wash. 1904.
- Rawson, Charles I., Oxford, Mass. 1918.
- Ray, Milton S., 118 New Montgomery St., San Francisco, Calif. 1899.
- Record, Miss Gladys E., 44 Fairview Ave., Los Gatos, Calif. 1926.
- Reemer, D. Herbert, 860 N. Michigan Ave., Pasadena, Calif. 1925.
- Reid, Russell, 210 Thayer St., Bismark, N. Dakota. 1921.
- Reis, C. Oscar, 647 Juanita Ave., Los Angeles, Calif. 1917.
- Rett, Egmont J., Santa Barbara Mus. Comparative Oology, Mission Canyon, Santa Barbara, Calif. 1922.
- Rich, Dr. Guy C., 1820 El Cerrito Place, Hollywood, Calif. 1911.
- Rich, Waldo L., Saratoga Springs, N. Y. 1919.
- Richards, E. B., 128 Chester St., Grass Valley, Calif. 1909.
- Richards, Dr. T. W., U. S. N., 1724 P St., N. W., Washington, D. C. 1908.
- Richards, W. W., 112 Market St., San Francisco, Calif. 1915.
- Richardson, Carl, Trail, Oregon. 1925.
- Richardson, Wm., care Walter L. Richardson, R. F. D. 3, Box 243, Porterville, Calif. 1925.
- Richardson, W. D., 4215 Prairie Ave., Chicago, Ill. 1918.
- §Richmond, Dr. Chas. W., U. S. Nat. Museum, Washington, D. C. 1904.
- Richmond, Frank, care Richmond Bros., El Centro, Calif. 1920.
- Rigden, Miss Nellie C., 2019 Lake St., San Francisco, Calif. 1926.
- Rishel, John B., Whittier School, 24th Ave. and Marion St., Denver, Colo. 1925.
- Riley, J. H., U. S. Nat. Museum, Washington, D. C. 1909.
- Rittenhouse, Samuel, 5752 Chesley Ave., Los Angeles, Calif. 1916.
- Ritter, Prof. W. E., Science Service, 20th and B Sts., Washington, D. C. 1901.
- Robb, Wallace H., P. O. Box 98, Belleville, Ont., Canada. 1925.
- Roberts, Dr. T. S., Zoological Museum, Univ. Minn., Minneapolis, Minn. 1909.
- Robertson, Howard, 157 Wilton Drive, Los Angeles, Calif. 1896.
- §Robertson, John McB., Buena Park, Calif. 1913.

- Robertson, Mrs. John McB., Buena Park, Calif. 1920.
- Roe, Mrs. E. D., Pelton Water Wheel Co., 19th and Harrison Sts., San Francisco, Calif. 1919.
- Rogers, Dr. Wallace, 65 Hurt St., Atlanta, Ga. 1925.
- Ross, Roland C., 388 Dearborn St., Pasadena, Calif. 1920.
- Rowan, Prof. Wm., Dept. Zool., Univ. Alberta, Edmonton, Alta., Canada. 1921.
- Rowen, Daniel, Berkeley Inn, Berkeley, Calif. 1925.
- Rowley, Robert C., 1172 W. 29th St., Los Angeles, Calif. 1926.
- Rowley, J., 403 S. 1st St., Alhambra, Calif. 1909.
- Rush, Miss Lora Gertrude, 1607 Walnut St., Berkeley, Calif. 1920.
- Russell, Carl P., P. O. Box 153, Yosemite, Calif. 1923.
- Rust, Henry J., Box 683, Coeur d'Alene, Idaho. 1911.
- Sampson, W. B., 1005 N. San Joaquin St., Stockton, Calif. 1894.
- Sampson, W. F., 215 Market St., San Francisco, Calif. 1926.
- Sanborn, Colin Campbell, Field Museum Nat. Hist., Chicago, Ill. 1924.
- Sanderson, Miss Dorothy, 937 Orange Grove Ave., Hollywood, Calif. 1922.
- Sanford, Dr. Leonard C., 347 Temple St., New Haven, Conn. 1915.
- Sanford, W. H., 919 W. Acacia St., Stockton, Calif. 1915.
- Saunders, Aretas A., 48 Longview Ave., Fairfield, Conn. 1909.
- Saunders, Mrs. E. J., 122 N. Friends Ave., Whittier, Calif. 1925.
- Saunders, Mrs. Kenneth, Creston Road, High Acres, Berkeley, Calif. 1920.
- Saunders, W. E., London, Ont., Canada. 1910.
- Sawyer, Edmund Joseph, Yellowstone Park, Wyoming. 1925.
- Schaefer, Oscar F., 724 Woodbine Ave., Rochester, N. Y. 1917.
- Schenck, W. Egbert, 17 Panoramic Way, Berkeley, Calif. 1924.
- Schenck, Sara M. (Mrs. W. Egbert), 17 Panoramic Way, Berkeley, Calif. 1924.
- Schlesinger, Mrs. Jane L., 64 Fairview Ave., Piedmont, Calif. 1915.
- Schneider, Fred A., care Warren Dried Fruit Co., San Jose, Calif. 1901.
- Schneider, Mrs. G. H., 4618 Kingswell Ave., Los Angeles, Calif. 1921.
- §Schneider, J. J., Box 363, Anaheim, Calif. 1899.
- Schussler, Geo. W., 1345 Oak St., San Francisco, Calif. 1911.
- Sclater, William Lutley, 10 Sloane Court, London, S. W., England. 1909.
- Sefton, J. W., Jr., 650 F St., San Diego, Calif. 1923.
- Seymour, Mrs. Geo. H., 101 N. Kennilworth Ave., Oak Park, Ill. 1922.
- Sharp, Clarence S., Escondido, Calif. 1902.
- Sharples, Mrs. J. M., Juneau, Alaska. 1924.
- Sharples, Robert P., West Chester, Pa. 1911.
- Shaw, Prof. W. T., Box 819, Stanford University, Calif. 1911.
- Shelton, Alfred C., Johnston-Shelton Co., Dayton, Ohio. 1909.
- Shepard, John Alden, Route A, Morgan Hill, Calif. 1919.
- Shepherd, A. R., 457 W. Burchett St., Glendale, Calif. 1920.
- Shepherd, Mrs. Hattie E., R. R. 1, Box 73, Redlands, Calif. 1921.
- \*§Sherman, Althea R., National, via McGregor, Iowa. 1911 (1916).
- Sherwood, Jack, Box 264, Salinas, Calif. 1923.
- Sherwood, Wm. E., 787 Cross St., Salem, Ore. 1923.
- Shiras, George, 3d, Stoneleigh Court, Washington, D. C. 1914.
- Silliman, Edmund, Alisal and Ryker Sts., Salinas, Calif. 1918.
- Silliman, O. P., 220 Salinas St., Salinas, Calif. 1893.
- Simonds, Dr. Paul E., 304 Loring Bldg., Riverside, Calif. 1922.
- Simpson, Geo. Buchanan, Lake Cowichan, B. C., Canada. 1926.
- Simpson, Roger G., 201 Tunnel Road, Berkeley, Calif. 1924.
- Sinsel, Joseph A., 612 Pleasant Ave., Yakima, Wash. 1924.
- Sismey, Eric Deane, Power House No. 3, Big Creek, Fresno Co., Calif. 1925.
- \*Skinner, M. P., N. Y. State College of Forestry, Syracuse, N. Y. 1915.
- Sloanaker, Jos. L., 907 W. Mansfield Ave., Spokane, Wash. 1910.
- Smith, Allyn G., 1825 Hopkins St., Berkeley, Calif. 1909.
- Smith, Austin P., care Hotel Lafayette, Havana, Cuba. 1907.
- Smith, Chas. Piper, 354 So. 10th St., San Jose, Calif. 1923.
- Smith, C. R., 563 42d Ave., San Francisco, Calif. 1917.
- Smith, Miss Emily, Route 1, Box 56, Los Gatos, Calif. 1924.
- Smith, Prof. Frank, 802 Ohio St., Urbana, Ill. 1911.
- Smith, Franklin J., Box 98, Eureka, Calif. 1913.
- Smith, Horace G., 2918 Lafayette St., Denver, Colo. 1914.
- Smith, Napier, Bank of Montreal, Verdun, Quebec, Canada. 1919.
- Snell, Charles H., Box 101, Red Deer, Alberta, Canada. 1926.
- Snyder, Prof. J. O., Box 775, Stanford University, Calif. 1900.
- Snyder, L. L., Royal Ontario Museum of Zoology, Bloor St. and Avenue Road, Toronto, Ont., Canada. 1924.
- Spaulding, Prof. M. Herrick, Agr. Coll., Bozeman, Mont. 1918.
- Spaulding, Manfred Kenwood, Box 984, Westwood, Calif. 1924.
- Sprot, George Doveton, Cobble Hill, Vancouver Island, B. C. 1925.

- Stacey, John William, 645 Leavenworth St., San Francisco, Calif. 1921.
- Stafford, John LeMoyne, Box 128, Gresham, Ore. 1924.
- Stahl, Charlotte, 955 So. Alvarado St., Los Angeles, Calif. 1924.
- Stansell, S. S., 2345 Spring St., Paso Robles, Calif. 1925.
- Steinbeck, Wm. P., 611 Bristol Ave., Stockton, Calif. 1897.
- Stephens, T. C., Morningside College, Sioux City, Iowa. 1914.
- Stephenson, Miss Omie, Monte Vista, Colo. 1922.
- Stock, Mrs. Chester, 2841 Forest Ave., Berkeley, Calif. 1924.
- Stoddard, H. L., Beachton, Grady Co., Ga. 1914.
- Stone, D. D., R.D. 3, Oswego, N. Y. 1909.
- Stone, Geo. E., Box 371, Carmel, Calif. 1912.
- Stone, Harry Herbert, Jr., P. O. Box 101, Sturbridge, Mass. 1925.
- Stone, Dr. Witmer, Academy Nat. Sciences, Logan Circle, Philadelphia, Pa. 1924.
- Stoner, Emerson A., Box 444, Benicia, Calif. 1918.
- Storer, Miss Mary S., 467 San Pablo Ave., Fresno, Calif. 1914.
- Storer, Prof. Tracy I., University Farm, Davis, Calif. 1910.
- Stormont, W. P., 214 No. Ave. 53, Los Angeles, Calif. 1917.
- Stow, Harry P., 1617 Central Ave., Alameda, Calif. 1921.
- Streator, Clark P., 16 Mason St., Santa Cruz, Calif. 1919.
- \*§Strong, W. A., 41 Grand Ave., San Jose, Calif. 1912 (1920).
- Strong, Wm. Duncan, care Dept. of Anthropology, Univ. of Calif., Berkeley, Calif. 1921.
- Stuart, Geo. H., 3d, 923 Clinton St., Philadelphia, Pa. 1913.
- Stuart, Morton, U. S. Forest Service, Santa Barbara, Calif. 1924.
- Suffel, Shumway, 105 So. Madison Ave., Pasadena, Calif. 1926.
- Sugden, J. W., 47 S. 8th W. St., Salt Lake City, Utah. 1915.
- Summer, E. L., Jr., 1343 So. Palomares St., Pomona, Calif. 1924.
- Sutton, George Miksch, State Game Commission, Harrisburg, Pa. 1924.
- Swales, B. H., U. S. Nat. Museum, Washington, D. C. 1898.
- §Swarth, Harry S., Museum Vert. Zool., Berkeley, Calif. 1897.
- Sweeney, Joseph A., U. S. Forest Service, Nenzel, Neb. 1912.
- Swenk, Prof. Myron Harmon, 1410 N. 37th St., Lincoln, Neb. 1916.
- Sykes, Mildred E., 3915 S. Vermont Ave., Los Angeles, Calif. 1924.
- Taft, Elsey R., Banning, Calif. 1925.
- Tanner, V. M., Brigham Young University, Provo, Utah. 1919.
- Tate, Ralph C., Kenton, Okla. 1924.
- Taverner, P. A., Zool. Div., Geol. Survey, Ottawa, Ont., Canada. 1909.
- Taylor, E. F., Grass Valley, Nevada Co., Calif. 1910.
- Taylor, Mrs. H. J., 2813 Channing Way, Berkeley, Calif. 1920.
- Taylor, Jesse H., Box 125, Eagle Rock, Calif. 1919.
- Taylor, Lionel V., Kelowna, B. C., Canada. 1921.
- Taylor, Dr. Walter P., 1746 E. Fifth St., Tucson, Ariz. 1905.
- Teachenor, Dix, 437 W. 60th St. Terrace, Kansas City, Mo. 1922.
- Tenney, Vernon L., 2536 Etna St., Berkeley, Calif. 1922.
- Terrill, L. McL., 44 Stanley Ave., St. Lambert, Que., Canada. 1911.
- Test, Dr. Louis A., 222 North St., W. Lafayette, Ind. 1908.
- \*§Thayer, John E., Box 98, Lancaster, Mass. 1906 (1914).
- Thomas, Geo. C., 3d, 1014 Crescent Drive, Beverly Hills, Calif. 1922.
- Thompson, Albert E., Box 712, Blythe, Calif. 1923.
- Thompson, Frederick, P. O. Box 720, Mill Valley, Calif. 1925.
- Thompson, Mrs. H. F., 817 S. Spring St., Los Angeles, Calif. 1922.
- Thompson, J. Walcott, 527 E. 1st S. St., Salt Lake City, Utah. 1918.
- Thomson, Miss Isabel A., 5939 Shafter Ave., Oakland, Calif. 1918.
- Thowless, Herbert L., 255 Fourth St., Newark, N. J. 1919.
- Tindall, Charles W., 912 N. Noland St., Independence, Mo. 1920.
- Todd, W. E. Clyde, Carnegie Museum, Pittsburgh, Pa. 1909.
- Tonkin, George, Biol. Survey, 211 P. O. Bldg., Berkeley, Calif. 1920.
- Torrey, Frederic C., 1 Canyon Road, Berkeley, Calif. 1921.
- Townsend, Dr. Charles W., Ipswich, Mass. 1925.
- Trapier, Paul E., 3672 Mentone Ave., Palms, Calif. 1926.
- Treganza, A. O., 522 S. 13th St. E., Salt Lake City, Utah. 1907.
- Treganza, Mrs. A. O., 522 S. 13th St. E., Salt Lake City, Utah. 1915.
- Trenor, Thomas, Hotel Congress, San Francisco, Calif. 1913.
- Trescot, E. B., R.D. 4, Box 221, Petaluma, Calif. 1915.
- Trost, Henry, 475 29th St., San Francisco, Calif. 1924.
- Trumbull, J. H., 39 Farmington Ave., Plainville, Conn. 1911.
- Tucker, Miss Estelle, Box 218, Yosemite, Calif. 1926.
- Turnbull, James Douglas, 2065 48th Ave. West, Vancouver, B. C. 1923.
- \*Tyler, John G., P. O. Box 173, Fresno, Calif. 1905 (1920).
- Tyler, Dr. Winsor M., 522 Massachusetts Ave., Lexington, Mass. 1914.

- Unglish, W. E., Gilroy, Calif. 1910.  
 Urner, Charles Anderson, 613. Cleveland Ave., Elizabeth, N. J. 1925.  
 Van Dellen, Daniel, 48 Maple St., Salinas, Calif. 1925.  
 §Van Rossem, Adriaan J., 514 Lester Ave., Pasadena, Calif. 1909.  
 \*Van Straaten, H., Het Veldhuis, 8 Denersweg, Velp, Holland. 1918 (1919).  
 Von Lengerke, Justus, 257 Highland Ave., Orange, N. J. 1925.  
 Varick, Wm. Remsen, San Marcus Bldg., Santa Barbara, Calif. 1923.  
 Voorhies, Mrs. R. K., 4939 Pasadena Ave., Los Angeles, Calif. 1926.  
 Vorhies, Prof. Chas. T., Univ. Ariz., Tucson, Ariz. 1916.  
 Vignos, Blanch, 667 So. Carondelet St., Los Angeles, Calif. 1926.  
 Wagner, Edward H., 527 San Joaquin St., Stockton, Calif. 1922.  
 Wales, Joseph H., 2225 Maiden Lane, Altadena, Calif. 1925.  
 Walker, Alex., Tillamook, Ore. 1911.  
 Walker, Ernest P., Biol. Survey, Juneau, Alaska. 1910.  
 Walker, Geo. R., R. F. D. 3, Murray, Utah. 1926.  
 Walker, P. Smith, 2127 Cypress St., Vancouver, B. C., Canada. 1926.  
 Wanzer, James O., Route 3, Box 1086, Oakland, Calif. 1921.  
 Ward, F. H., 18 Grove Place, Rochester, N. Y. 1915.  
 Warmer, Charles A., 1310 Baker-Detwiler Bldg., Los Angeles, Calif. 1920.  
 Warmer, Mrs. Edna R., 1310 Baker-Detwiler Bldg., Los Angeles, Calif. 1921.  
 Warren, E. R., 1511 Wood Ave., Colorado Springs, Colo. 1909.  
 Waterhouse, John Thomas, care Alexander and Baldwin, Ltd., Honolulu, T. H. 1921.  
 Weber, J. A., 151 Grand Ave., Leonia, N. J. 1915.  
 Webster, Frederick S., 954 N. Van Ness Ave., Hollywood, Calif. 1925.  
 Wegeforth, Dr. Harry M., 210 Maple St., San Diego, Calif. 1920.  
 Weiser, Charles S., 101 W. Springettsburg Ave., York, Pa. 1920.  
 Welch, L. W., 1845 Olive Ave., Long Beach, Calif. 1911.  
 Welsh, Joseph, Pasadena Hdw. Co., Pasadena, Calif. 1917.  
 Werner, Miss Selma, 2085 Sacramento St., San Francisco, Calif. 1925.  
 Wetmore, Dr. Alexander, U. S. National Museum, Washington, D. C. 1909.  
 Weydemeyer, Winston, Agricultural Substation, Moccasin, Montana. 1926.  
 Wheeler, Mrs. J. W., 403 15th Ave. N., Seattle, Wash. 1912.  
 Wheeler, Roswell S., 3815 Park Blvd., Oakland, Calif. 1894.  
 White, F. B., Concord, N. H. 1926.  
 White, Halsted G., 528 San Luis Road, Berkeley, Calif. 1914.  
 Whitney, Miss Margaret W., 1563 N. Raymond Ave., Pasadena, Calif. 1919.  
 Whittle, Charles L., 50 Congress St., Boston, Mass. 1922.  
 Widmann, Berthold, 4621 Wesley Ave., Los Angeles, Calif. 1923.  
 Widmann, O., 5105 Enright Ave., St. Louis, Mo. 1904.  
 Wilder, H. E., Carlotta, Humboldt Co., Calif. 1909.  
 Willard, B. G., 51 Fresh Pond Parkway, Cambridge, Mass. 1910.  
 \*§Willard, F. C., Farmingdale, Long Island, N. Y. 1905.  
 Willett, Geo., Ketchikan, Alaska. 1905.  
 Williams, Laidlaw O., P. O. Box 665, Carmel, Calif. 1925.  
 Williams, Robert W., Tallahassee, Fla. 1914.  
 Wilson, Gordon, 1434 Chestnut St., Bowling Green, Ky. 1924.  
 Winson, J. W., Box 642, Sumas, Wash. 1925.  
 Withey, George C., Deering, N. Dak. 1924.  
 Wolfe, Lieut. L. R., Fort Douglas, Salt Lake City, Utah. 1921.  
 Wood, Dr. Casey A., care The Librarian, McGill University, Montreal, Canada. 1916.  
 Wood, Dr. Clifford H., Glendora, Calif. 1922.  
 Wood, Mrs. Mildred Tiffany, Hyampom, Trinity Co., Calif. 1921.  
 Wood, Norman A., Museum Zool., Ann Arbor, Mich. 1916.  
 Woodruff, Frank M., Chicago Acad. Sciences, Chicago, Ill. 1906.  
 Woodruff, Regina, Whittier College, Whittier, Calif. 1920.  
 Woods, Robert S., 919 S. Bonnie Brae, Los Angeles, Calif. 1920.  
 \*Wright, Curtis, 900 High St., Oakland, Calif. 1916 (1922).  
 §Wright, Frank S., 14 Cayuga St., Auburn, N. Y. 1910.  
 Wright, Howard W., 830 N. Orange Grove Ave., Pasadena, Calif. 1921.  
 Wright, William S., Nat. Hist. Museum, Balboa Park, San Diego, Calif. 1924.  
 \*Wyman, L. E., Museum Hist., Sci. and Art, Los Angeles, Calif. 1908 (1920).  
 Wythe, Margaret W., Museum Vert. Zool., Berkeley, Calif. 1912.  
 Yeates, E. Woodruff, 3978 Washington St., San Francisco, Calif. 1925.  
 Yoder, Wm. H., Jr., 4510 N. Carlisle St., Philadelphia, Pa. 1926.  
 Yost, Mrs. Myrtle K., 2831 N. Broadway, Los Angeles, Calif. 1923.  
 Young, Pauline Rodgers, 1219 N. 6th Ave., Tucson, Ariz. 1918.  
 Zahn, Mrs. Francis M. Harmon, 2115 Estrella Ave., Los Angeles, Calif. 1912.  
 Zahn, Otto J., 2115 Estrella Ave., Los Angeles, Calif. 1896.  
 Zech, Miss Lillian, 335 W. Highland Ave., Redlands, Calif. 1916.  
 Zerlang, John, 524 W. Hawthorne St., Eureka, Calif. 1918.  
 Zerlang, Lawrence, 524 W. Hawthorne St., Eureka, Calif. 1918.
